# Supplementary material
Source: Springer Nature journal article supplement (https://www.springermedizin.de/resource/supplementary/12887_2011_548_MOESM8_ESM.pdf/9475412)

**Food category**

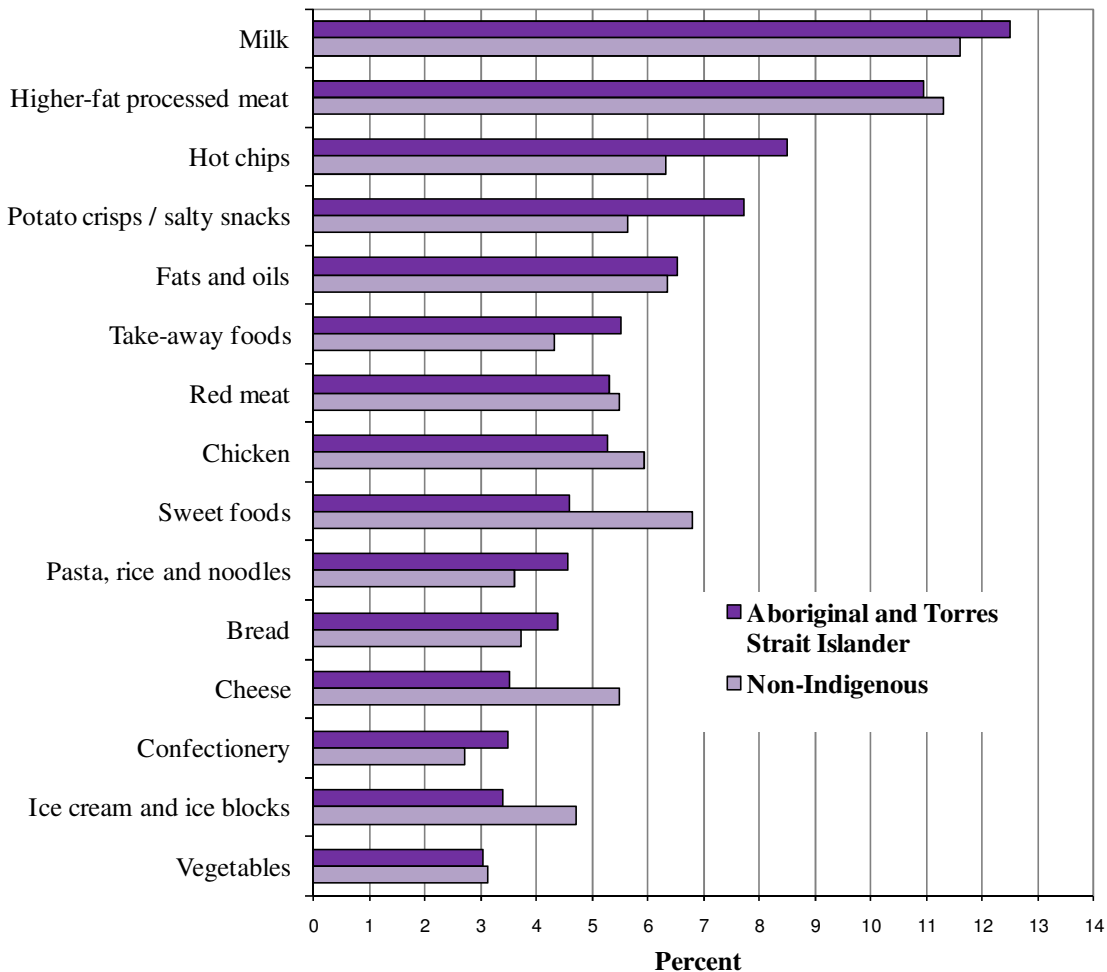

Supplement: MOESM8 [file 9475412]
